# Supplementary material
Source: PubMed Central journal article supplement (PMC8290975)
Supplement: NIHMS1721462-supplement-supinfo.pdf [file NIHMS1721462-supplement-supinfo.pdf]

**Table S1. Test for differential attrition in baseline demographic and clinical characteristics among the Asian group.**

|                                              | Missing (n=16) | Non-missing (n=86) | $\chi^2$ (df) or $t$ (df); $p$ |
|----------------------------------------------|----------------|--------------------|--------------------------------|
| <b>Baseline demographics</b>                 |                |                    |                                |
| Age, mean (SD)                               | 80.6 (6.9)     | 77.5 (7.3)         | $t(100) = 1.58; p = .12$       |
| Gender, n (%)                                |                |                    |                                |
| Male                                         | 4 (25.0%)      | 19 (22.1%)         | $\chi^2(1) = .07; p = .80$     |
| Female                                       | 12 (75.0%)     | 67 (77.9%)         |                                |
| Education, n(%)                              |                |                    |                                |
| Less than high school                        | 8 (50.0%)      | 31 (36.0%)         | $\chi^2(1) = 1.11; p = .29$    |
| High school or more                          | 8 (50.0%)      | 55 (64.0%)         |                                |
| Place of birth, n(%)                         |                |                    |                                |
| Outside of U.S.                              | 16 (100.0%)    | 86 (100.0%)        |                                |
| U.S.                                         | 0 (.0%)        | 0 (.0%)            |                                |
| Self-rated physical health, n(%)             |                |                    |                                |
| Good/Very Good/Excellent                     | 2 (12.5%)      | 20 (23.3%)         | $\chi^2(1) = .92; p = .34$     |
| Fair/Poor                                    | 14 (87.5%)     | 66 (76.7%)         |                                |
| Language, n(%)                               |                |                    |                                |
| English                                      | 0 (.0%)        | 1 (1.2%)           | $\chi^2(1) = .19; p = .67$     |
| Spanish                                      | 0 (.0%)        | 0 (.0%)            |                                |
| Mandarin/Cantonese                           | 16 (100.0%)    | 85 (98.8%)         |                                |
| Any chronic conditions, n (%)                |                |                    |                                |
| No                                           | 2 (12.5%)      | 7 (8.1%)           | $\chi^2(1) = .32; p = .57$     |
| Yes                                          | 14 (87.5%)     | 79 (91.9%)         |                                |
| <b>Baseline clinical characteristics</b>     |                |                    |                                |
| PTSD (PCL-5), mean (SD)                      | 6.4 (6.2)      | 9.5 (11.2)         | $t(100) = -1.06; p = .29$      |
| Traumatic exposure <sup>a</sup> (BTQ), n (%) |                |                    |                                |
| No                                           | 13 (81.3%)     | 56 (66.7%)         | $\chi^2(1) = 1.34; p = .25$    |
| Yes                                          | 3 (18.8%)      | 28 (33.3%)         |                                |
| Depression (PHQ-9), mean (SD)                | 9.3 (4.9)      | 6.9 (5.1)          | $t(100) = 1.71; p = .09$       |
| Anxiety (GAD-7), mean (SD)                   | 6.4 (5.4)      | 4.5 (4.5)          | $t(100) = 1.50; p = .14$       |
| ESS score <sup>b</sup> , mean (SD)           | 8.5 (5.6)      | 8.3 (4.9)          | $t(100) = .12; p = .91$        |
| 0-9 n (%)                                    | 9 (56.3%)      | 58 (67.4%)         | $\chi^2(1) = .75; p = .39$     |
| 10-24 n (%)                                  | 7 (43.8%)      | 28 (32.6%)         |                                |

Notes:

<sup>a</sup> Traumatic exposure was defined as meeting DSM-IV A.1 criteria for post-traumatic stress disorder: respondents experienced, witnessed or was confronted with an event or events that involved actual or threatened death or serious injury, or a threat to the physical integrity of self or others.

<sup>b</sup> ESS scores between 0 and 9 are indicative of a respondent being unlikely to have abnormal sleepiness or an average amount of daytime sleepiness; ESS scores between 10 and 24 are indicative that a respondent may be excessively sleepy and may need medical attention or that a respondent is excessively sleepy and should consider seeking medical attention.

**Table S2. Association between PTSD (PCL-5 scores) and normal cognitive functioning (MoCA scores  $\geq$  25) among Latino and Asian older adults.**

| <i>Dependent variable: Normal cognitive functioning (MoCA scores <math>\geq</math> 25)</i> |                       |          |                   |          |                   |          |
|--------------------------------------------------------------------------------------------|-----------------------|----------|-------------------|----------|-------------------|----------|
|                                                                                            | <b>Latino (n=134)</b> |          |                   |          |                   |          |
|                                                                                            | Model 1               |          | Model 2           |          | Model 3           |          |
|                                                                                            | OR [95% CI]           | <i>p</i> | OR [95% CI]       | <i>p</i> | OR [95% CI]       | <i>p</i> |
| PTSD (PCL-5 scores)                                                                        | .99 [.95, 1.05]       | .81      | .99 [.94, 1.04]   | .73      | .99 [.94, 1.05]   | .83      |
| Sleep: ESS scores (0-9 reference) <sup>a</sup>                                             |                       |          |                   |          |                   |          |
| 10-24                                                                                      |                       |          |                   |          | .92 [.09, 9.95]   | .95      |
| Sleep # PTSD (interaction)                                                                 |                       |          |                   |          | .98 [.85, 1.13]   | .79      |
| Age                                                                                        |                       |          | .96 [.86, 1.07]   | .42      | .96 [.85, 1.07]   | .43      |
| Gender (male reference)                                                                    |                       |          |                   |          |                   |          |
| Female                                                                                     |                       |          | 2.66 [.31, 23.04] | .37      | 2.45 [.27, 21.91] | .42      |
| Education (< HS reference)                                                                 |                       |          |                   |          |                   |          |
| HS or more                                                                                 |                       |          | 4.94 [.56, 43.29] | .15      | 5.17 [.58, 45.79] | .14      |
| Self-reported physical health (good/very good/excellent reference)                         |                       |          |                   |          |                   |          |
| Fair/poor                                                                                  |                       |          | .38 [.07, 2.02]   | .26      | .43 [.07, 2.49]   | .35      |
| <b>Asian (n=86)</b>                                                                        |                       |          |                   |          |                   |          |
|                                                                                            | Model 1               |          | Model 2           |          | Model 3           |          |
|                                                                                            | OR [95% CI]           | <i>p</i> | OR [95% CI]       | <i>p</i> | OR [95% CI]       | <i>p</i> |
| PTSD (PCL-5 scores)                                                                        | .93 [.87, .99]        | .02      | .92 [.86, .99]    | .02      | .87 [.77, .97]    | .01      |
| Sleep: ESS scores (0-9 reference) <sup>a</sup>                                             |                       |          |                   |          |                   |          |
| 10-24                                                                                      |                       |          |                   |          | .31 [.07, 1.45]   | .14      |
| Sleep # PTSD (interaction)                                                                 |                       |          |                   |          | 1.12 [.98, 1.28]  | .11      |
| Age                                                                                        |                       |          | .96 [.89, 1.03]   | .26      | .95 [.88, 1.03]   | .23      |
| Gender (male reference)                                                                    |                       |          |                   |          |                   |          |
| Female                                                                                     |                       |          | 1.37 [.36, 5.24]  | .64      | 1.26 [.32, 4.91]  | .74      |
| Education (< HS reference)                                                                 |                       |          |                   |          |                   |          |
| HS or more                                                                                 |                       |          | 1.77 [.61, 5.19]  | .30      | 2.01 [.66, 6.17]  | .22      |
| Self-reported physical health (good/very good/excellent reference)                         |                       |          |                   |          |                   |          |
| Fair/poor                                                                                  |                       |          | .52 [.17, 1.63]   | .26      | .49 [.15, 1.61]   | .24      |

Notes:

<sup>a</sup> ESS scores between 0 and 9 are indicative of a respondent being unlikely to have abnormal sleepiness or an average amount of daytime sleepiness; ESS scores between 10 and 24 are indicative that a respondent may be excessively sleepy and may need medical attention or that a respondent is excessively sleepy and should consider seeking medical attention.

**Table S3. Association between PTSD (PCL-5 scores) and normal cognitive functioning (MoCA scores  $\geq$  24) among Latino older adults using a MoCA cut-off score of 24.**

| <i>Dependent variable: Normal cognitive functioning (MoCA scores <math>\geq</math> 24)</i> |                       |          |                     |          |                     |          |
|--------------------------------------------------------------------------------------------|-----------------------|----------|---------------------|----------|---------------------|----------|
|                                                                                            | <b>Latino (n=134)</b> |          |                     |          |                     |          |
|                                                                                            | Model 1               |          | Model 2             |          | Model 3             |          |
|                                                                                            | OR [95% CI]           | <i>p</i> | OR [95% CI]         | <i>p</i> | OR [95% CI]         | <i>p</i> |
| PTSD (PCL-5 scores)                                                                        | .98 [.94, 1.03]       | .43      | .98 [.94, 1.02]     | .41      | .98 [.94, 1.03]     | .51      |
| Sleep: ESS scores (0-9 reference) <sup>a</sup>                                             |                       |          |                     |          |                     |          |
| 10-24                                                                                      |                       |          |                     |          | .76 [.13, 4.46]     | .77      |
| Sleep # PTSD (interaction)                                                                 |                       |          |                     |          | .99 [.89, 1.10]     | .85      |
| Age                                                                                        |                       |          | .97 [.89, 1.05]     | .42      | .97 [.89, 1.06]     | .46      |
| Gender (male reference)                                                                    |                       |          |                     |          |                     |          |
| Female                                                                                     |                       |          | 1.47 [.37, 5.92]    | .59      | 1.35 [.33, 5.61]    | .68      |
| Education (< HS reference)                                                                 |                       |          |                     |          |                     |          |
| HS or more                                                                                 |                       |          | 10.55 [1.30, 85.93] | .03      | 11.02 [1.34, 90.42] | .03      |
| Self-reported physical health (good/very good/excellent reference)                         |                       |          |                     |          |                     |          |
| Fair/poor                                                                                  |                       |          | .46 [.13, 1.60]     | .22      | .52 [.14, 1.90]     | .32      |

Notes:

<sup>a</sup> ESS scores between 0 and 9 are indicative of a respondent being unlikely to have abnormal sleepiness or an average amount of daytime sleepiness; ESS scores between 10 and 24 are indicative that a respondent may be excessively sleepy and may need medical attention or that a respondent is excessively sleepy and should consider seeking medical attention.

**Table S4. Association between PTSD (PCL-5 scores) and normal cognitive functioning (MoCA scores  $\geq$  25) among Latino and Asian older adults using additional controls.**

| <i>Dependent variable: Normal cognitive functioning (MoCA scores <math>\geq</math> 25)</i> |                       |          |                   |          |                   |          |
|--------------------------------------------------------------------------------------------|-----------------------|----------|-------------------|----------|-------------------|----------|
|                                                                                            | <b>Latino (n=134)</b> |          |                   |          |                   |          |
|                                                                                            | Model 1               |          | Model 2           |          | Model 3           |          |
|                                                                                            | OR [95% CI]           | <i>p</i> | OR [95% CI]       | <i>p</i> | OR [95% CI]       | <i>p</i> |
| PTSD (PCL-5 scores)                                                                        | .99 [.94, 1.04]       | .75      | .99 [.94, 1.05]   | .78      | .99 [.94, 1.04]   | .64      |
| Place of birth (U.S. reference)                                                            |                       |          |                   |          |                   |          |
| Outside the U.S.                                                                           |                       |          |                   |          | 3.93 [.46, 33.94] | .21      |
| Age                                                                                        | .96 [.85, 1.07]       | .43      | .95 [.85, 1.07]   | .40      | .96 [.85, 1.08]   | .48      |
| Gender (male reference)                                                                    |                       |          |                   |          |                   |          |
| Female                                                                                     | 2.66 [.29, 24.11]     | .38      | 2.79 [.31, 25.10] | .36      | 2.39 [.27, 21.43] | .44      |
| Education (< HS reference)                                                                 |                       |          |                   |          |                   |          |
| HS or more                                                                                 | 4.94 [.56, 43.48]     | .15      | 5.03 [.57, 44.34] | .15      | 5.56 [.61, 50.86] | .13      |
| Self-reported physical health (good/very good/excellent reference)                         |                       |          |                   |          |                   |          |
| Fair/poor                                                                                  | .38 [.07, 2.06]       | .26      | .38 [.07, 2.02]   | .26      | .40 [.07, 2.19]   | .29      |
| Any chronic condition (none reference)                                                     |                       |          |                   |          |                   |          |
| 1+ chronic condition                                                                       | 1.00 [.15, 6.43]      | 1.00     |                   |          |                   |          |
| 12-month psychotropic medication use (no reference) <sup>a</sup>                           |                       |          |                   |          |                   |          |
| Yes                                                                                        |                       |          | .81 [.13, 4.96]   | .82      |                   |          |
| <b>Asian (n=86)</b>                                                                        |                       |          |                   |          |                   |          |
|                                                                                            | Model 1               |          | Model 2           |          |                   |          |
|                                                                                            | OR [95% CI]           | <i>p</i> | OR [95% CI]       | <i>p</i> |                   |          |
| PTSD (PCL-5 scores)                                                                        | .92 [.86, .99]        | .02      | .93 [.87, 1.00]   | .05      |                   |          |
| Age                                                                                        | .96 [.89, 1.03]       | .26      | .96 [.89, 1.04]   | .29      |                   |          |
| Gender (male reference)                                                                    |                       |          |                   |          |                   |          |
| Female                                                                                     | 1.34 [.35, 5.20]      | .67      | 1.44 [.37, 5.67]  | .60      |                   |          |
| Education (< HS reference)                                                                 |                       |          |                   |          |                   |          |
| HS or more                                                                                 | 1.76 [.60, 5.16]      | .31      | 1.94 [.66, 5.75]  | .23      |                   |          |
| Self-reported physical health (good/very good/excellent reference)                         |                       |          |                   |          |                   |          |
| Fair/poor                                                                                  | .53 [.17, 1.66]       | .28      | .57 [.18, 1.78]   | .33      |                   |          |
| Any chronic condition (none reference)                                                     |                       |          |                   |          |                   |          |
| 1+ chronic condition                                                                       | .83 [.15, 4.51]       | .83      |                   |          |                   |          |
| 12-month psychotropic medication use (no reference) <sup>a</sup>                           |                       |          |                   |          |                   |          |
| Yes                                                                                        |                       |          | .28 [.03, 2.64]   | .27      |                   |          |

Notes:

<sup>a</sup> Psychotropic medication use was assessed through the question “Have you gotten a prescription or medicine

---

for your emotions, nerves or mental health from a psychiatrist, psychiatrist nurse practitioner, or PCP in the last 12-months??"

Supplementary Table S1: Differential attrition comparing Asians with MoCA score and Asians without MoCA scores.

Supplementary Table S2: Additional variables associated with cognitive functioning.

Supplementary Table S3: Model estimates among Latino participants using a MoCA cutoff score of 24.

Supplementary Table S4: Sensitivity analyses with additional controls.
